# Supplementary material for: Standardizing effect size from linear regression models with log-transformed variables for meta-analysis
Source: BMC Med Res Methodol. 2017 Mar 17;17:44. doi: 10.1186/s12874-017-0322-8 (PMC5356327; doi:10.1186/s12874-017-0322-8)
Supplement: Additional file 2: — Excel template to transform original effect size using the proposed formulae. (XLSX 19 kb) [file 12874_2017_322_MOESM2_ESM.xlsx]

## Sheet: Relative change in X
Instructions
1. Fix k parameter in cell C7, the desired common relative change in X. For example k=1.5 means an increase of 50%; k=2 means 2-fold increase; etc.
2. Enter regression coefficients, their standard errors, and means of X and Y for each study in columns B, C, D and E
3. Select the model used in each study in column F. If there is log-transformation, indicate the base of the logarithms (e, 2, 10) in columns G and H
4. Choose one of the two expressions of change in Y (absolute or relative) and take these results for meta-analysis
	k =	1.5			Models	Bases
					Y = α + β·X + ε	2.71828	(e)
					Y = α + β·logb(X) + ε	2
					loga(Y) = α + β·X + ε	10
					loga(Y) = α + β·logb(X) + ε
	β	se(β)	E[X]	E[Y]	Model	a Base of log(Y)	b Base of log(X)	Absolute change in Y for a relative change of k times in X			Relative change in Y for a relative change of k times in X
								Effect size	95% CI		Effect size	95% CI
Study 1								---	---	---	---	---	---
Study 2								---	---	---	---	---	---
Study 3								---	---	---	---	---	---
Study 4								---	---	---	---	---	---
Study 5								---	---	---	---	---	---
Study 6								---	---	---	---	---	---
Study 7								---	---	---	---	---	---
Study 8								---	---	---	---	---	---
Study 9								---	---	---	---	---	---
Study 10								---	---	---	---	---	---
Study 11								---	---	---	---	---	---
Study 12								---	---	---	---	---	---
Study 13								---	---	---	---	---	---
Study 14								---	---	---	---	---	---
Study 15								---	---	---	---	---	---
Study 16								---	---	---	---	---	---
Study 17								---	---	---	---	---	---
Study 18								---	---	---	---	---	---
Study 19								---	---	---	---	---	---
Study 20								---	---	---	---	---	---

## Sheet: Absolute change in X
Instructions
1. Fix c parameter in cell C7, the desired common absolute change in X. For example c=1 means an increase of 1 unit.
2. Enter regression coefficients, their standard errors, and means of X and Y for each study in columns B, C, D and E
3. Select the model used in each study in column F. If there is log-transformation, indicate the base of the logarithms (e, 2, 10) in columns G and H
4. Choose one of the two expressions of change in Y (absolute or relative) and take these results for meta-analysis
	c =	1			Models	Bases
					Y = α + β·X + ε	2.71828	(e)
					Y = α + β·logb(X) + ε	2
					loga(Y) = α + β·X + ε	10
					loga(Y) = α + β·logb(X) + ε
	β	se(β)	E[X]	E[Y]	Model	a Base of log(Y)	b Base of log(X)	Absolute change in Y for an absolute change of c units in X			Relative change in Y for an absolute change of c units in X
								Effect size	95% CI		Effect size	95% CI
Author 1								---	---	---	---	---	---
Author 2								---	---	---	---	---	---
Author 3								---	---	---	---	---	---
Author 4								---	---	---	---	---	---
Author 5								---	---	---	---	---	---
Author 6								---	---	---	---	---	---
Author 7								---	---	---	---	---	---
Author 8								---	---	---	---	---	---
Author 9								---	---	---	---	---	---
Author 10								---	---	---	---	---	---
Author 11								---	---	---	---	---	---
Author 12								---	---	---	---	---	---
Author 13								---	---	---	---	---	---
Author 14								---	---	---	---	---	---
Author 15								---	---	---	---	---	---
Author 16								---	---	---	---	---	---
Author 17								---	---	---	---	---	---
Author 18								---	---	---	---	---	---
Author 19								---	---	---	---	---	---
Author 20								---	---	---	---	---	---
